# Supplementary material
Source: publisher figshare collection journal article supplement (https://gsapubs.figshare.com/ndownloader/files/31801781)
Supplement: Supplementary file 1 [file 31801781]

## Sheet: Sheet1
	Thermal history model input table for the Cauca River Canyon (Colombia)
	1. Thermochronologic data
	Samples and data used in models
	Model
	AFT data	Model 1	Model 2	Model 3	Model 4	Model 5	Model 6	Model 7	Model 8	Model 9	Model 10		Data source	All data needed for modeling published?
	273	x											Sup. Table y	Yes
	274		x										Sup. Table y	Yes
	267			x									Sup. Table y	Yes
	070118_04				x								Sup. Table y	Yes
	070118_05					x							Sup. Table y	Yes
	070118_09						x						Sup. Table y	Yes
	070118_08							x					Sup. Table y	Yes
	070118_07								x				Sup. Table y	Yes
	060118-03									x			Sup. Table y	Yes
	060118-02										x		Sup. Table y	Yes
	AHe data
	267			x									Sup. Table y	Yes
	070118_05					x							Sup. Table y	Yes
	Age GOF	0.89	0.84	1	0.74	0.87	0.94	0.97	0.95	0.94	0.9
	TL GOF	0.76	0.76	0.99	0.9	0.55	0.95	0.95	0.72	0.98	0.79
	Pulse of exhumation at 10 Ma?	Yes	Yes	Yes	Yes	Yes	Yes	No	No	No	No
	AHe GOF	NA	NA	0.93	NA	0.87	NA	NA	NA	NA	NA
	Data treatment, uncertainties, and other relevant constraints
	AFT Data	Zeta calibration: 330 — 6 (NPC)
		Analyses completed at Thermochronology Laboratory at Syracuse University by Nicolas Pérez-Consuegra
	AHe data	Analyses completed at Thermochronology Laboratory University of Potsdam (Germany) by E. Sobel
	Other geochronology
	2. Additional geologic information
	Age of intrusion of granite	Sabanalarga Batholith	ca. 70+10 Ma		Zapata-Villada et al., 2021
	Mean surface temperature		20 ± 10°C
	3. System- and model-specific parameters
		Modeling program:		HeFTy v. 1.9.3
	Model	Statistical fitting criteria:		Default. GOF values >0.05 are acceptable fits.
				GOF values >0.5 are good fit
		Ending condition:		500 good paths
		Annealing model:		Ketcham et al. (2007)
	AFT	C-axis projection		Ketcham et al. (2007), 5.0M; model used c-axis projected lengths
		Default initial mean track length			From Dpar (16.3 µm); length reduction in standard 0.893
		Kinetic parameter			Dpar (µm), one kinetic population
		Dpar calibration for inverse HeFTy modeling: 0.997				(after Ketcham et al., 2015)
		Length calibration for inverse HeFTy modeling: 1.01				(after Ketcham et al., 2015)
	AHe	Calibration: RDAAM, apatite (Flowers et al. 2009); Precision, Good
		Stopping distances: Ketcham et al. (2011), Alpha calculation: Redistribution
		Age to report: Corrected; Alpha age correction: Ketcham et al. (2011)
